# Supplementary material for: Thermo-Mechanical Recyclability of Additively Manufactured Polypropylene and Polylactic Acid Parts and Polypropylene Support Structures
Source: MDPI journal article supplement (doi:10.3390/polym15102291), 2023-05-12
Supplement: s1 [file s1]

## Supporting Information

# Thermo-mechanical recyclability of additively manufactured polypropylene and polylactic acid parts and polypropylene support structures

Niko Nagengast<sup>1</sup>, Christian Bay<sup>2,3</sup>, Frank Döpfer<sup>2,3</sup>, Hans-Werner Schmidt<sup>4,5</sup>, Christian Neuber<sup>4\*</sup>

1 Biomechanics, University of Bayreuth, Universitaetsstrasse 30, 95447 Bayreuth, Germany

2 Research Center for Additive Innovations, University of Bayreuth, Universitaetsstrasse 30, 95447 Bayreuth, Germany

3 Manufacturing and Remanufacturing Technology, University of Bayreuth, Universitaetsstrasse 30, 95447 Bayreuth, Germany

4 Macromolecular Chemistry, University of Bayreuth, Universitaetsstrasse 30, 95447 Bayreuth, Germany

5 Bavarian Polymer Institute, University of Bayreuth, Universitaetsstrasse 30, 95447 Bayreuth, Germany

\* Correspondence: christian.neuber@uni-bayreuth.de

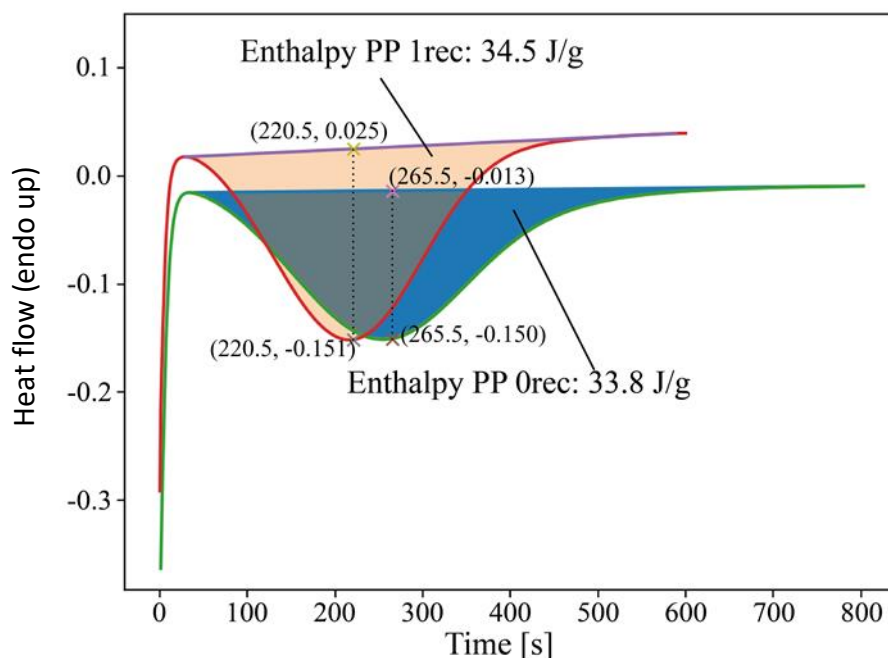

Figure S1: DSC curves of isothermal crystallization measurements of the virgin (PP 0rec) and recycled (PP 1rec) Polypropylene at  $T = 110^{\circ}\text{C}$ .

Table S1: E-Modulus of the investigated polymers in 0°- direction

|             | 0° E-Modulus values [MPa] |          |         |         |             |             |
|-------------|---------------------------|----------|---------|---------|-------------|-------------|
|             | PLA 0rec                  | PLA 1rec | PP 0rec | PP 1rec | PP Sup 0rec | PP Sup 1rec |
| <b>MAX</b>  | 3538                      | 3380     | 545     | 521     | 1479        | 1491        |
| <b>MIN</b>  | 2483                      | 2230     | 413     | 482     | 1430        | 1212        |
| <b>MEAN</b> | 2971                      | 2836     | 445     | 500     | 1456        | 1401        |
| <b>STDV</b> | 312                       | 377      | 47      | 20      | 21          | 70          |

Table S2: Tensile strain values of investigated polymers in 0°- direction

|             | 0° Tensile strain at break values [%] |          |         |         |             |             |
|-------------|---------------------------------------|----------|---------|---------|-------------|-------------|
|             | PLA 0rec                              | PLA 1rec | PP 0rec | PP 1rec | PP Sup 0rec | PP Sup 1rec |
| <b>MAX</b>  | 7.3                                   | 10.8     | 1856    | 1930    | 283         | 252         |
| <b>MIN</b>  | 1.9                                   | 3.0      | 1553    | 1915    | 132         | 56          |
| <b>MEAN</b> | 3.6                                   | 6,0      | 1697    | 1929    | 199         | 163         |
| <b>STDV</b> | 1.7                                   | 2.4      | 88      | 8.5     | 58          | 66          |

Table S3: Tensile yield strenth values of investigated polymers in 0°- direction

|             | 0° Tensile yield strength values [MPa] |          |         |         |             |             |
|-------------|----------------------------------------|----------|---------|---------|-------------|-------------|
|             | PLA 0rec                               | PLA 1rec | PP 0rec | PP 1rec | PP Sup 0rec | PP Sup 1rec |
| <b>MAX</b>  | 56                                     | 57       | 18      | 19      | 18          | 19          |
| <b>MIN</b>  | 45                                     | 47       | 14      | 16      | 15          | 13          |
| <b>MEAN</b> | 52                                     | 53       | 16      | 17      | 16          | 16          |
| <b>STDV</b> | 3.1                                    | 2.9      | 2.6     | 0.5     | 1.4         | 1.1         |

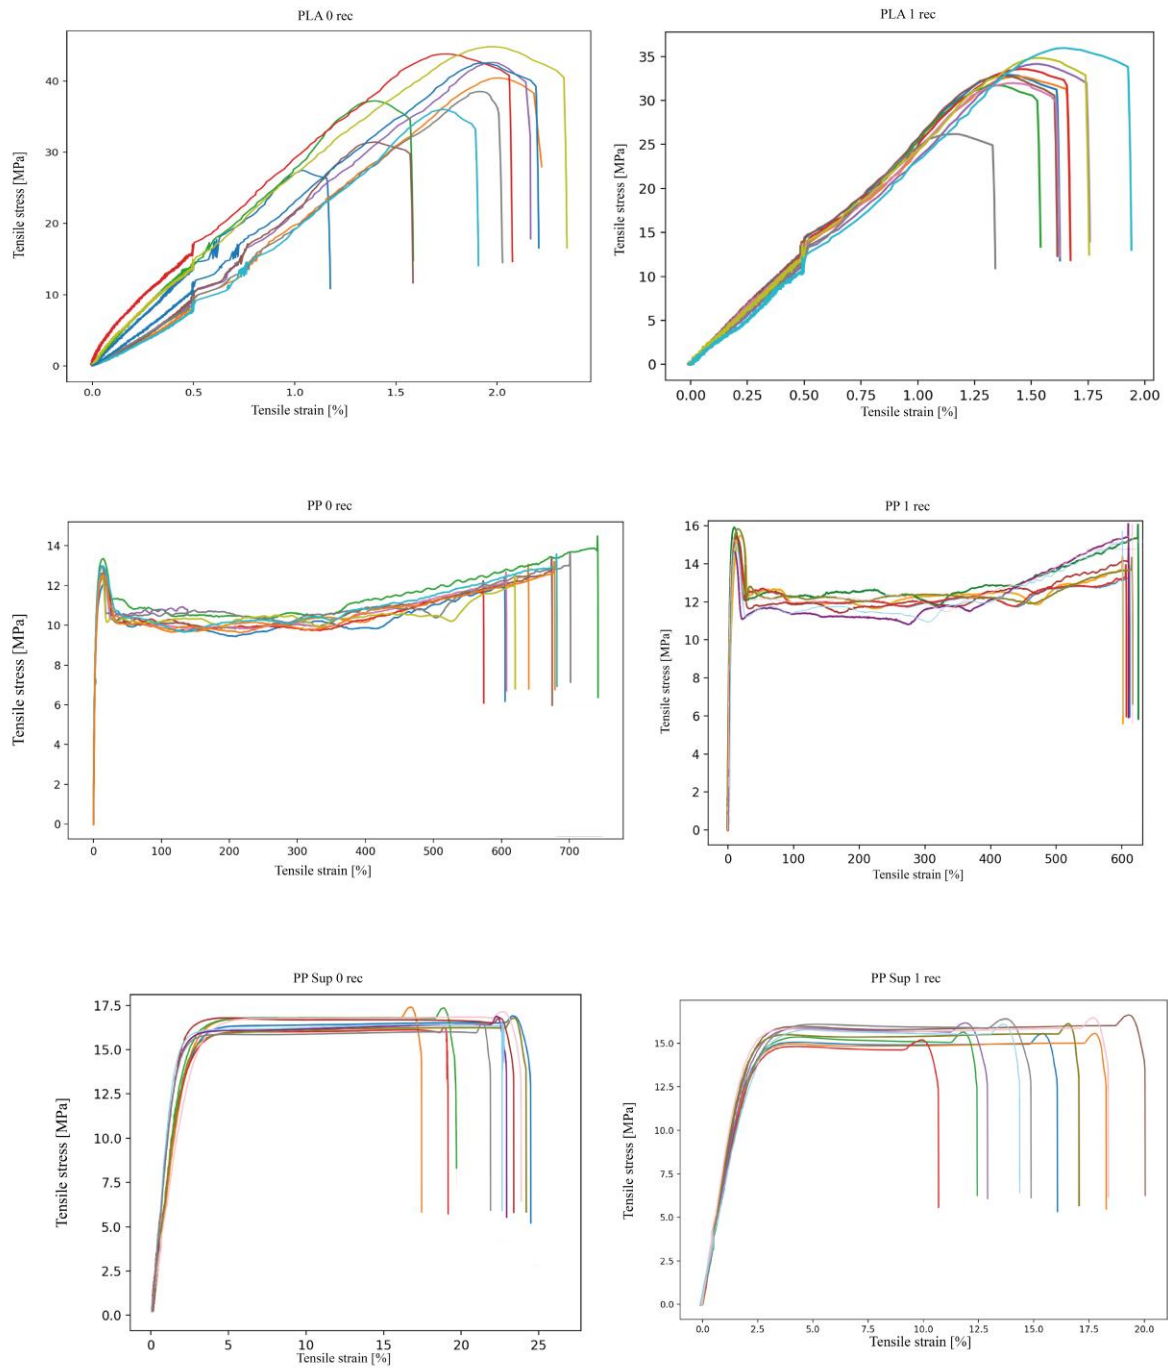

Figure S2: Tensile stress-strain curves of investigated polymers in 90°- direction.
